# Supplementary material
Source: HighWire-hosted journal article supplement (https://www.highwirestage.com/highwire/filestream/52549/field_highwire_adjunct_files/0/4173_table.pdf)
Supplement: 4173_table.pdf [file 4173_table.pdf]

**On-line Table 1: Search strategy—EMBASE 1988 to 2014 Week 16**

| No. | Searches                                                                                                                                                                                                                                                                                       | Results   | Search Type |
|-----|------------------------------------------------------------------------------------------------------------------------------------------------------------------------------------------------------------------------------------------------------------------------------------------------|-----------|-------------|
| 1   | Spinal diseases/or intervertebral disk degeneration/or intervertebral disk displacement/<br>or exp spondylolysis/                                                                                                                                                                              | 22,247    | Advanced    |
| 2   | Lumbar vertebrae/or zygapophyseal joint/                                                                                                                                                                                                                                                       | 11,470    | Advanced    |
| 3   | Osteoarthritis/or osteoarthritis, spine/                                                                                                                                                                                                                                                       | 48,654    | Advanced    |
| 4   | Osteoarthritis/and (2 or exp spinal diseases/)                                                                                                                                                                                                                                                 | 2766      | Advanced    |
| 5   | Diagnostic imaging/or exp magnetic resonance imaging/or exp radiography/or exp<br>radionuclide imaging/or exp tomography/or exp ultrasonography/                                                                                                                                               | 1,727,168 | Advanced    |
| 6   | Exp spine disease/and exp degenerative disease/                                                                                                                                                                                                                                                | 8885      | Advanced    |
| 7   | Low back pain/                                                                                                                                                                                                                                                                                 | 32,683    | Advanced    |
| 8   | Or/1–4,6–7                                                                                                                                                                                                                                                                                     | 108,803   | Advanced    |
| 9   | 8 and modic.mp. [mp = title, abstract, subject headings, heading word, drug trade name,<br>original title, device manufacturer, drug manufacturer, device trade name, keyword]                                                                                                                 | 243       | Advanced    |
| 10  | 5 and 8                                                                                                                                                                                                                                                                                        | 31,092    | Advanced    |
| 11  | 9 or 10                                                                                                                                                                                                                                                                                        | 31,135    | Advanced    |
| 12  | Asymptomatic disease/or asymptomatic.mp.                                                                                                                                                                                                                                                       | 124,137   | Advanced    |
| 13  | 11 and 12                                                                                                                                                                                                                                                                                      | 1022      | Advanced    |
| 14  | Comparative study/or cross-sectional study/or case control study/or cohort*.mp. or<br>prospective*.mp. or retrospective*.mp. [mp = title, abstract, subject headings,<br>heading word, drug trade name, original title, device manufacturer, drug<br>manufacturer, device trade name, keyword] | 1,967,431 | Advanced    |
| 15  | 13 and 14                                                                                                                                                                                                                                                                                      | 296       | Advanced    |
| 16  | Limit 15 to human                                                                                                                                                                                                                                                                              | 278       | Advanced    |
| 17  | Remove duplicates from 16                                                                                                                                                                                                                                                                      | 276       |             |
| 18  | (vertebral or spin*) adj2 (endplate or “end-plate”).mp. [mp = title, abstract, subject<br>headings, heading word, drug trade name, original title, device manufacturer,<br>drug manufacturer, device trade name, keyword]                                                                      | 493       | Advanced    |
| 19  | 14 and 18                                                                                                                                                                                                                                                                                      | 115       | Advanced    |
| 20  | 5 and 19                                                                                                                                                                                                                                                                                       | 85        |             |

**Note:**—exp indicates explosion search; mp, multipurpose; adj2, adjective 2.

**On-line Table 2: Search strategy—Ovid MEDLINE In-Process and other nonindexed citations and Ovid MEDLINE 1946 to Present**

| No. | Searches                                                                                                                                                                                                                                                                                                                                       | Results | Search Type |
|-----|------------------------------------------------------------------------------------------------------------------------------------------------------------------------------------------------------------------------------------------------------------------------------------------------------------------------------------------------|---------|-------------|
| 1   | Spinal diseases/or intervertebral disk degeneration/or intervertebral disk displacement/or exp spondylolysis/                                                                                                                                                                                                                                  | 34,995  | Advanced    |
| 2   | Low back pain/or osteoarthritis, spine.mp. or (spinal diseases/and osteoarthritis/) [mp = title, abstract, original title, name of substance word, subject heading word, keyword heading word, protocol supplementary concept word, rare disease supplementary concept word, unique identifier]                                                | 14,254  | Advanced    |
| 3   | Exp diagnostic imaging/and (1 or 2)                                                                                                                                                                                                                                                                                                            | 11,581  | Advanced    |
| 4   | 3 and asymptomatic*.mp. [mp = title, abstract, original title, name of substance word, subject heading word, keyword heading word, protocol supplementary concept word, rare disease supplementary concept word, unique identifier]                                                                                                            | 380     | Advanced    |
| 5   | (Modic or [(vertebral or spin*) adj2 (endplate* or "end-plate*")]).mp. [mp = title, abstract, original title, name of substance word, subject heading word, keyword heading word, protocol supplementary concept word, rare disease supplementary concept word, unique identifier]                                                             | 880     | Advanced    |
| 6   | 5 and asymptomatic*.mp. [mp = title, abstract, original title, name of substance word, subject heading word, keyword heading word, protocol supplementary concept word, rare disease supplementary concept word, unique identifier]                                                                                                            | 22      | Advanced    |
| 7   | 4 or 6                                                                                                                                                                                                                                                                                                                                         | 390     | Advanced    |
| 8   | 7 and (incidence or prevalence or frequency).mp. [mp = title, abstract, original title, name of substance word, subject heading word, keyword heading word, protocol supplementary concept word, rare disease supplementary concept word, unique identifier]                                                                                   | 99      | Advanced    |
| 9   | 7 and (comparative study/or cross-sectional study/or cohort*.mp. or prospective*.mp. or retrospective*.mp. or "case-control*").mp. [mp = title, abstract, original title, name of substance word, subject heading word, keyword heading word, protocol supplementary concept word, rare disease supplementary concept word, unique identifier] | 146     | Advanced    |
| 10  | 8 or 9                                                                                                                                                                                                                                                                                                                                         | 195     |             |
| 11  | [(lumbar or spinal or spine or vertebral) and (osteoarthritis or degenerat* or spondyl* or arthropath* or herniat*)].mp. [mp = title, abstract, original title, name of substance word, subject heading word, keyword heading word, protocol supplementary concept word, rare disease supplementary concept word, unique identifier]           | 41,194  | Advanced    |
| 12  | 11 and asymptomatic*.mp. [mp = title, abstract, original title, name of substance word, subject heading word, keyword heading word, protocol supplementary concept word, rare disease supplementary concept word, unique identifier]                                                                                                           | 795     | Advanced    |
| 13  | 12 and (mri or imag* or "magnetic resonance" or radiogra*).mp. [mp = title, abstract, original title, name of substance word, subject heading word, keyword heading word, protocol supplementary concept word, rare disease supplementary concept word, unique identifier]                                                                     | 519     | Advanced    |
| 14  | 13 and (compar* or "cross-section*" or "case control*" or cohort*).mp. [mp = title, abstract, original title, name of substance word, subject heading word, keyword heading word, protocol supplementary concept word, rare disease supplementary concept word, unique identifier]                                                             | 211     | Advanced    |
| 15  | 10 or 14                                                                                                                                                                                                                                                                                                                                       | 340     | Advanced    |
| 16  | Remove duplicates from 15                                                                                                                                                                                                                                                                                                                      | 334     | Advanced    |
| 17  | 10 or 15                                                                                                                                                                                                                                                                                                                                       | 340     |             |

**Note:**—exp indicates explosion search; mp, multipurpose; adj2, adjective 2.

**On-line Table 3: Summary of articles included in the systematic review**

| Author, Year                             | No. of Subjects | Age Range (yr)         | Patient Characteristics                                       | Imaging Modality | Degenerative Findings Reported                                                                                                             |
|------------------------------------------|-----------------|------------------------|---------------------------------------------------------------|------------------|--------------------------------------------------------------------------------------------------------------------------------------------|
| Boden et al, 1990 <sup>5</sup>           | 67              | 20–80                  | Volunteers                                                    | MRI              | Disk degeneration, disk bulge                                                                                                              |
| Boden et al, 1996 <sup>27</sup>          | 67              | 20–79                  | Volunteers                                                    | MRI              | Annular fissure                                                                                                                            |
| Boos et al, 1995 <sup>28</sup>           | 46              | 20–50                  | Volunteers                                                    | MRI              | Disk degeneration, disk protrusion                                                                                                         |
| Capel et al, 2009 <sup>29</sup>          | 60              | 18–31                  | Volunteer female dancers                                      | MRI              | Disk degeneration                                                                                                                          |
| Carragee et al, 2006 <sup>4</sup>        | 200             | 22–57                  | Volunteers                                                    | MRI              | Disk degeneration, disk protrusion, annular fissure, facet degeneration                                                                    |
| Danielson and Willen, 2001 <sup>30</sup> | 43              | 20–60                  | Volunteers                                                    | MRI              | Disk degeneration, disk protrusion                                                                                                         |
| Dora et al, 2002 <sup>31</sup>           | 46              | 20–50                  | Volunteers                                                    | MRI              | Disk protrusion                                                                                                                            |
| Edmondston et al, 2000 <sup>32</sup>     | 10              | 30 ± 5.8 <sup>a</sup>  | Volunteers                                                    | MRI              | Disk degeneration, disk protrusion                                                                                                         |
| Erkintalo et al, 1995 <sup>33</sup>      | 31              | 18                     | Volunteers                                                    | MRI              | Disk degeneration, disk height loss, disk protrusion                                                                                       |
| Feng et al, 2000 <sup>34</sup>           | 73              | 29–56                  | Volunteers                                                    | CT               | Disk protrusion                                                                                                                            |
| Gibson et al, 1987 <sup>35</sup>         | 20              | 14–19                  | Volunteers                                                    | MRI              | Disk protrusion                                                                                                                            |
| Greenberg et al, 1991 <sup>20</sup>      | 64              | 20–60                  | Volunteers                                                    | MRI              | Disk degeneration, disk bulge, disk protrusion                                                                                             |
| Hamanishi et al, 1994 <sup>36</sup>      | 81              | 20–80                  | Imaged for nonlumbar spine pathologies                        | MRI              | Schmorl nodes                                                                                                                              |
| Healy et al, 1996 <sup>37</sup>          | 19              | 41–69                  | Volunteer adult male athletes                                 | MRI              | Disk bulge                                                                                                                                 |
| Jarvik et al, 2001 <sup>22</sup>         | 148             | 35–70                  | Volunteers                                                    | MRI              | Disk degeneration, disk signal loss, disk height loss, disk bulge, disk protrusion, annular fissure, facet degeneration, spondylolisthesis |
| Jensen et al, 1994 <sup>38</sup>         | 98              | 20–80                  | Volunteers                                                    | MRI              | Disk bulge, disk protrusion                                                                                                                |
| Kalichman et al, 2010 <sup>6</sup>       | 150             | 40–80                  | Cross-sectional sample of Framingham Heart Study participants | CT               | Disk height loss, facet degeneration                                                                                                       |
| Kanayama et al, 2009 <sup>39</sup>       | 200             | 30–55                  | Volunteers                                                    | MRI              | Disk degeneration, disk protrusion                                                                                                         |
| Karakida et al, 2003 <sup>40</sup>       | 18              | 23–56                  | Volunteers                                                    | MRI              | Disk degeneration                                                                                                                          |
| Kjaer et al, 2005 <sup>41</sup>          | 412             | 40                     | Volunteers                                                    | MRI              | Disk degeneration, disk signal loss, disk height loss, disk protrusion, annular fissure, facet degeneration                                |
| Kovacs et al, 2014 <sup>42</sup>         | 64              | 41–47                  | Volunteers                                                    | MRI              | Disk degeneration, disk protrusion, spondylolisthesis                                                                                      |
| Matsumoto et al, 2013 <sup>43</sup>      | 94              | 48 ± 13.4 <sup>a</sup> | Volunteers                                                    | MRI              | Disk signal loss, disk height loss, disk protrusion                                                                                        |
| Paajanen et al, 1997 <sup>44</sup>       | 216             | 10–49                  | Volunteers                                                    | MRI              | Disk degeneration                                                                                                                          |
| Paajanen et al, 1989 <sup>45</sup>       | 34              | 20                     | Volunteers                                                    | MRI              | Disk degeneration                                                                                                                          |
| Ranson et al, 2005 <sup>46</sup>         | 53              | 25 ± 5 <sup>a</sup>    | Volunteer cricket players                                     | MRI              | Disk degeneration, disk signal loss                                                                                                        |
| Savage et al, 1997 <sup>47</sup>         | 149             | 45–62                  | Cross-sectional study of male workers                         | MRI              | Disk degeneration, disk protrusion, facet degeneration                                                                                     |
| Silcox et al, 1995 <sup>48</sup>         | 8               | 30–40                  | Volunteers                                                    | MRI              | Disk signal loss, disk height loss, disk bulge                                                                                             |
| Stadnik et al, 1998 <sup>49</sup>        | 36              | 20–45                  | Volunteers                                                    | MRI              | Disk bulge, disk protrusion, annular fissure                                                                                               |
| Szypryt et al, 1989 <sup>50</sup>        | 20              | 15–45                  | Volunteers                                                    | MRI              | Disk degeneration                                                                                                                          |
| Takatalo et al, 2012 <sup>11</sup>       | 167             | 20–23                  | Volunteers from birth cohort study                            | MRI              | Annular fissure                                                                                                                            |
| Weinreb et al, 1989 <sup>51</sup>        | 41              | 20–39                  | Asymptomatic nonpregnant female volunteers                    | MRI              | Disk bulge                                                                                                                                 |
| Weishaupt et al, 1998 <sup>52</sup>      | 60              | 20–50                  | Volunteers                                                    | MRI              | Disk signal loss, disk bulge, disk protrusion                                                                                              |
| Zobel et al, 2012 <sup>53</sup>          | 315             | 19–25                  | Volunteers                                                    | MRI              | Disk degeneration                                                                                                                          |

<sup>a</sup> Age range not available. Reported as mean ± SD.
